# Supplementary material for: Lauroylated, Acetylated, and Succinylated Agave tequilana Fructans Fractions: Structural Characterization, Prebiotic, Antibacterial Activity and Their Effect on Lactobacillus paracasei under Gastrointestinal Conditions
Source: MDPI journal article supplement (doi:10.3390/polym15143115), 2023-07-21

# Supplementary Materials:

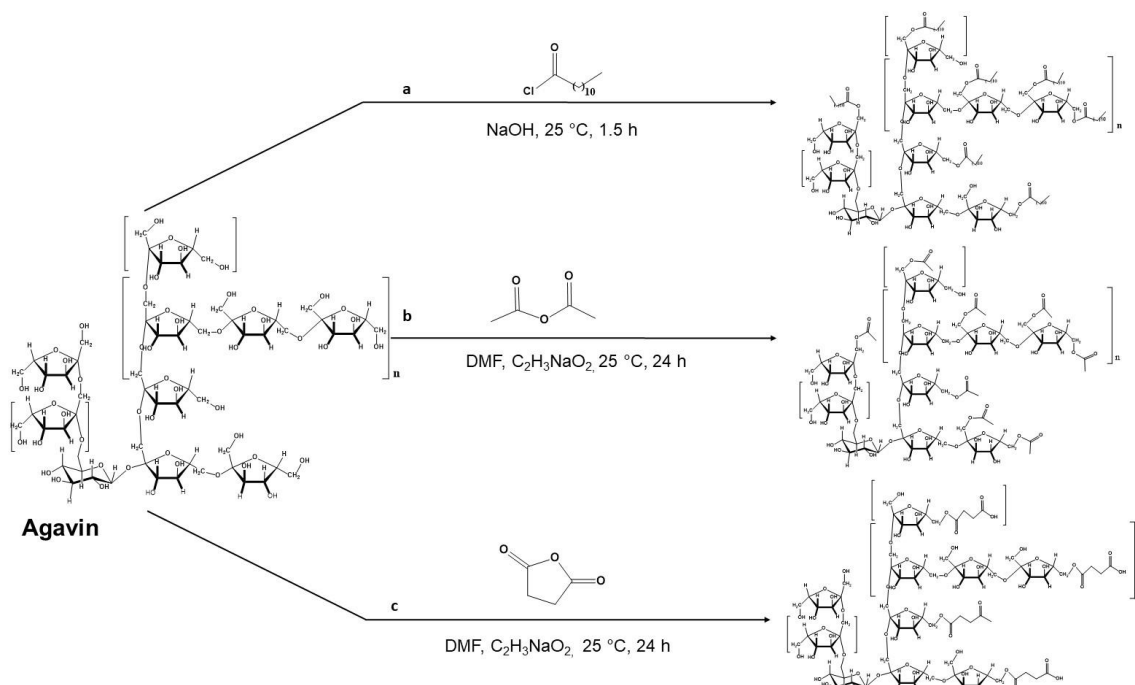

**Figure S1.** Proposed reaction mechanism of Agavin for the lauroylation (a), acetylation (b), and succinylated (c) reactions.

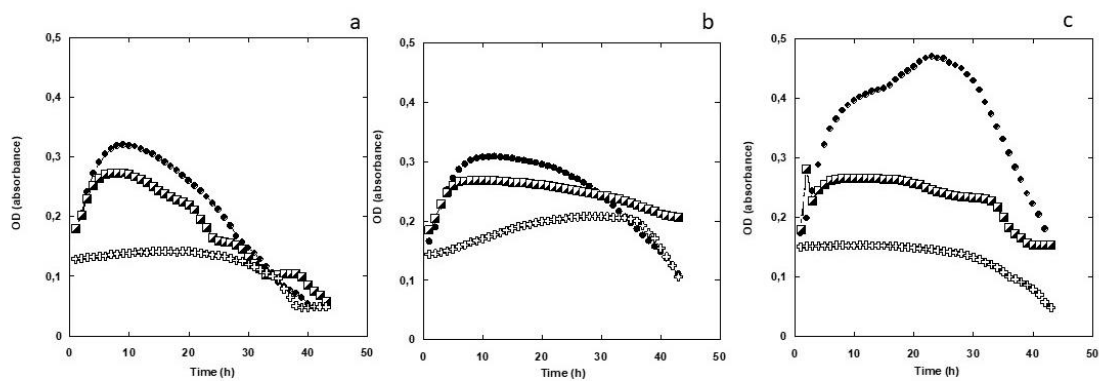

**Figure S2.** Growth curves of NAF (a), HPAF (b), and HDPAF (c) unmodified (●), acetylated (■) and succinylated (□)

Table S1. Absorbance during gastric and intestinal simulation in succinylated fructans.

| Fructans succinylated | Phase      | Abs                |
|-----------------------|------------|--------------------|
| NAF                   | Gastric    | $0.006 \pm 0.01^a$ |
| HPAF                  |            | $0.003 \pm 0.01^a$ |
| HDPAF                 |            | $0.002 \pm 0.01^a$ |
|                       | Intestinal |                    |
| NAF                   |            | $0.022 \pm 0.06^b$ |
| HPAF                  |            | $0.013 \pm 0.01^b$ |
| HDPAF                 |            | $0.016 \pm 0.01^b$ |

Values are given as mean  $\pm$  SD (n = 3). Different letters denote significant differences ( $P < 0.05$ ).

Figure S3. Full  $^1\text{H}$  NMR spectra

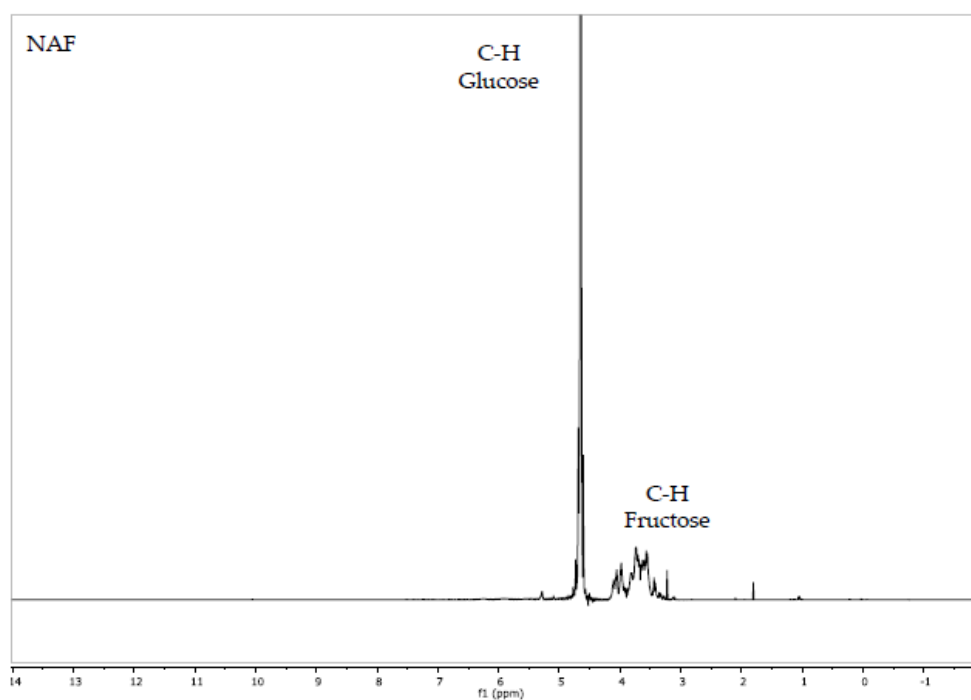

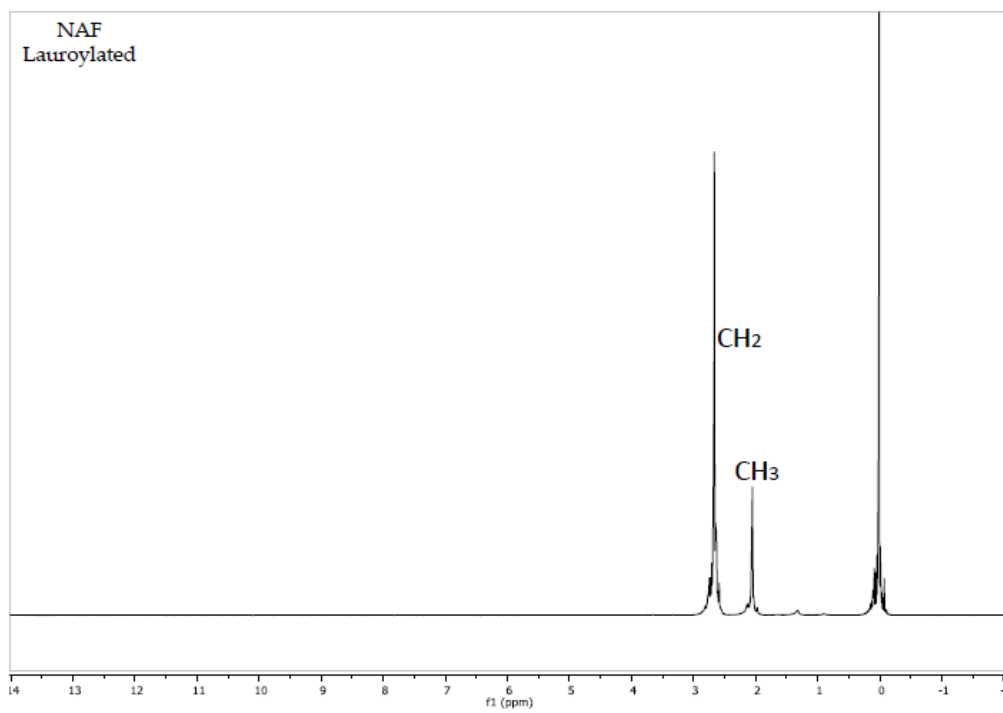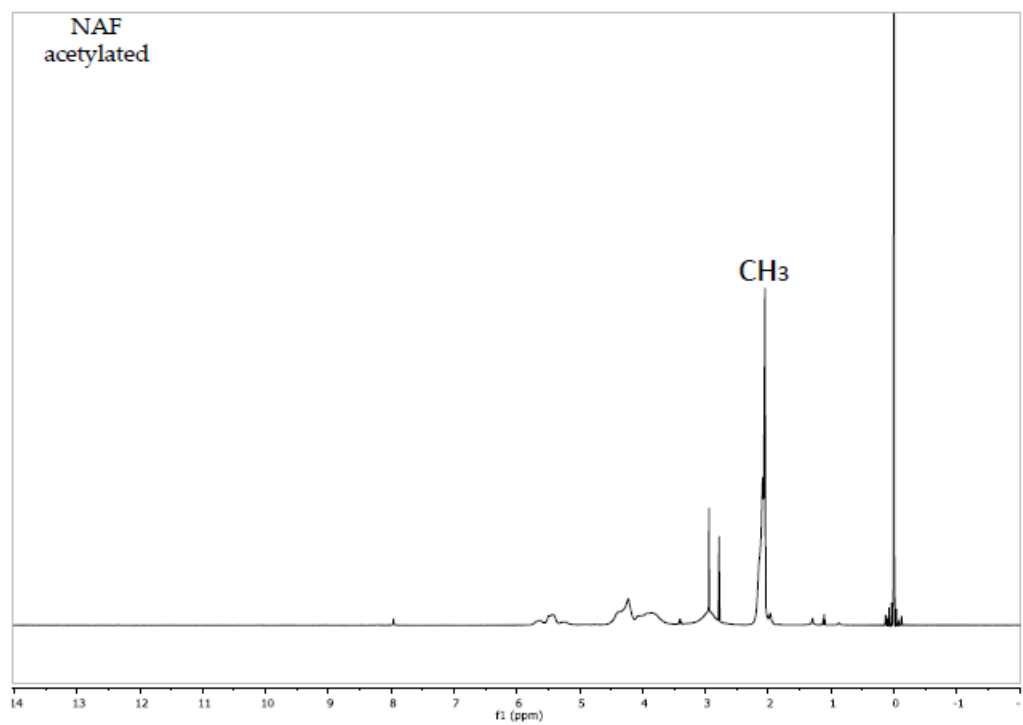

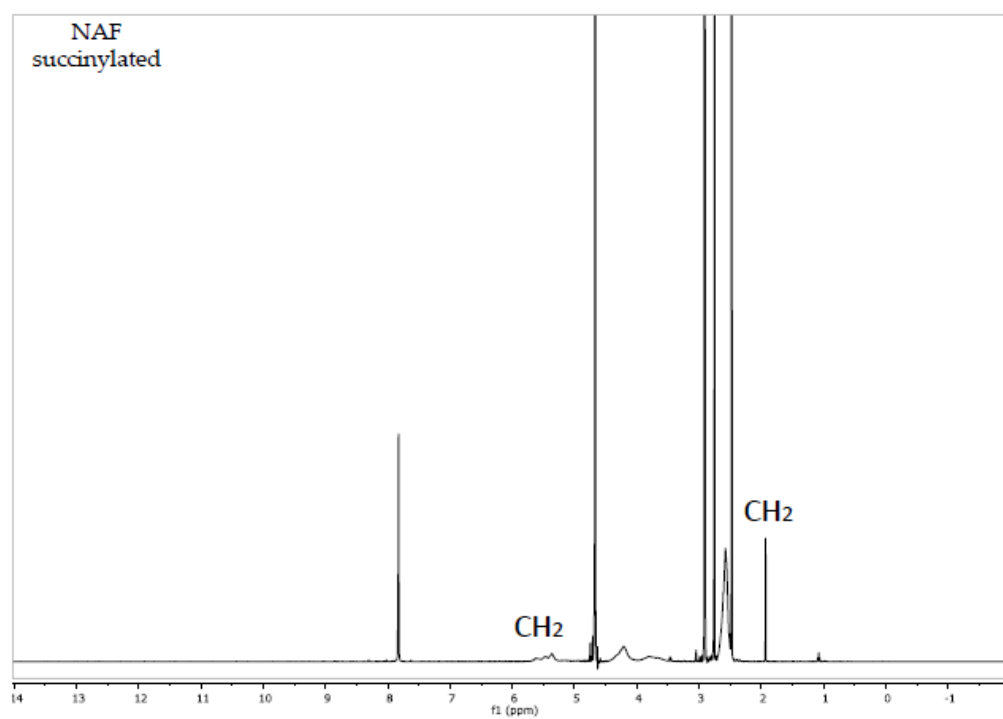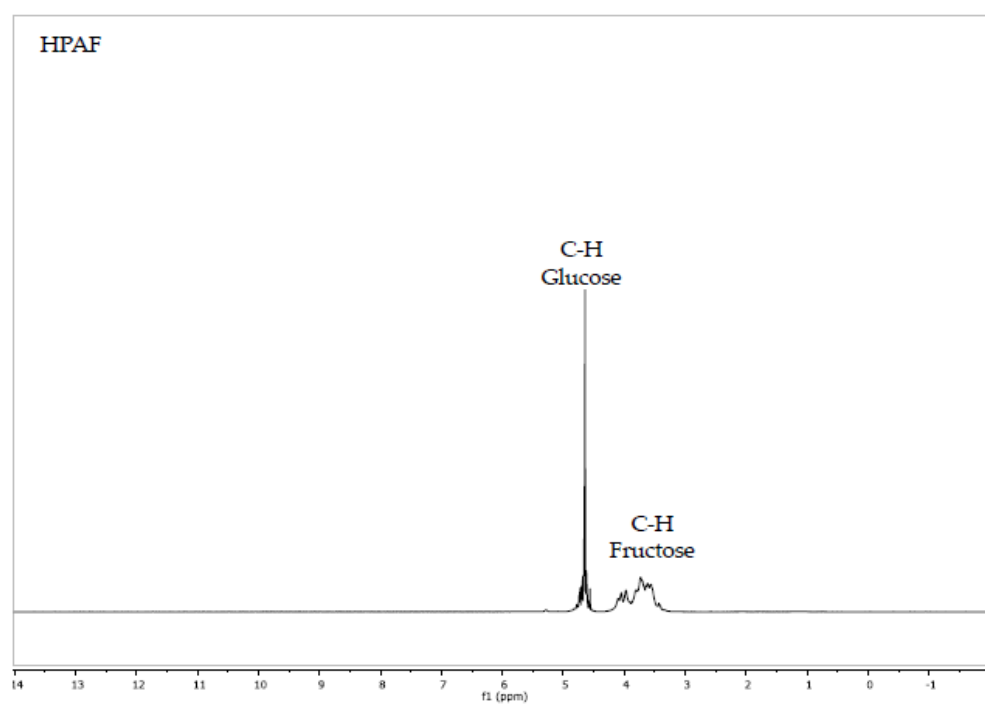

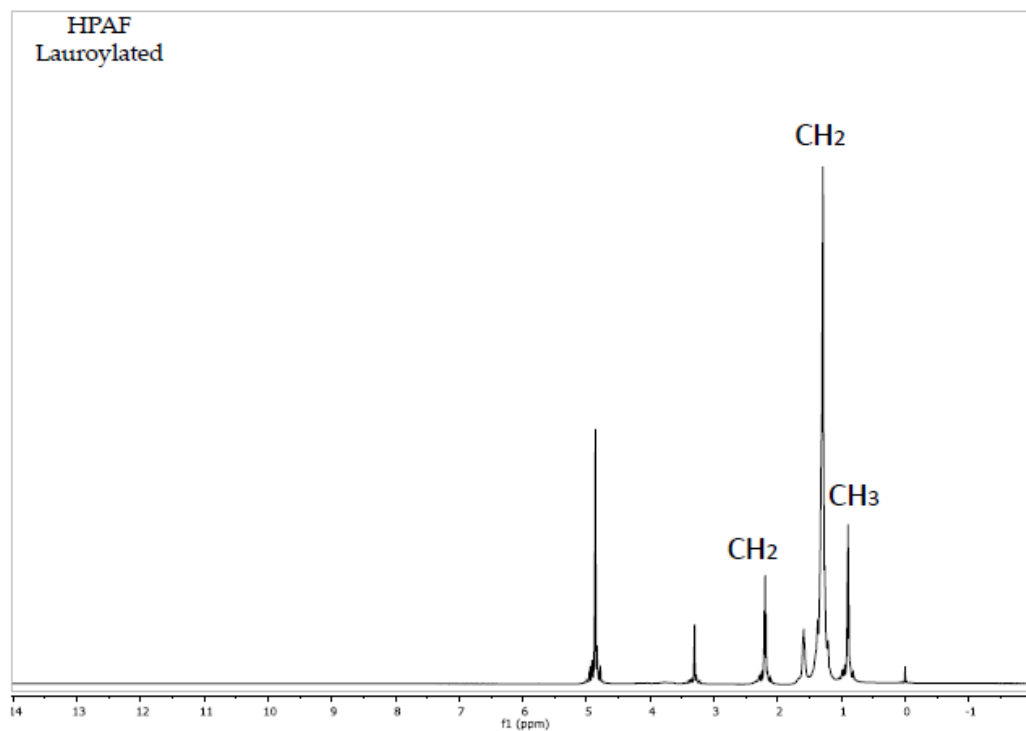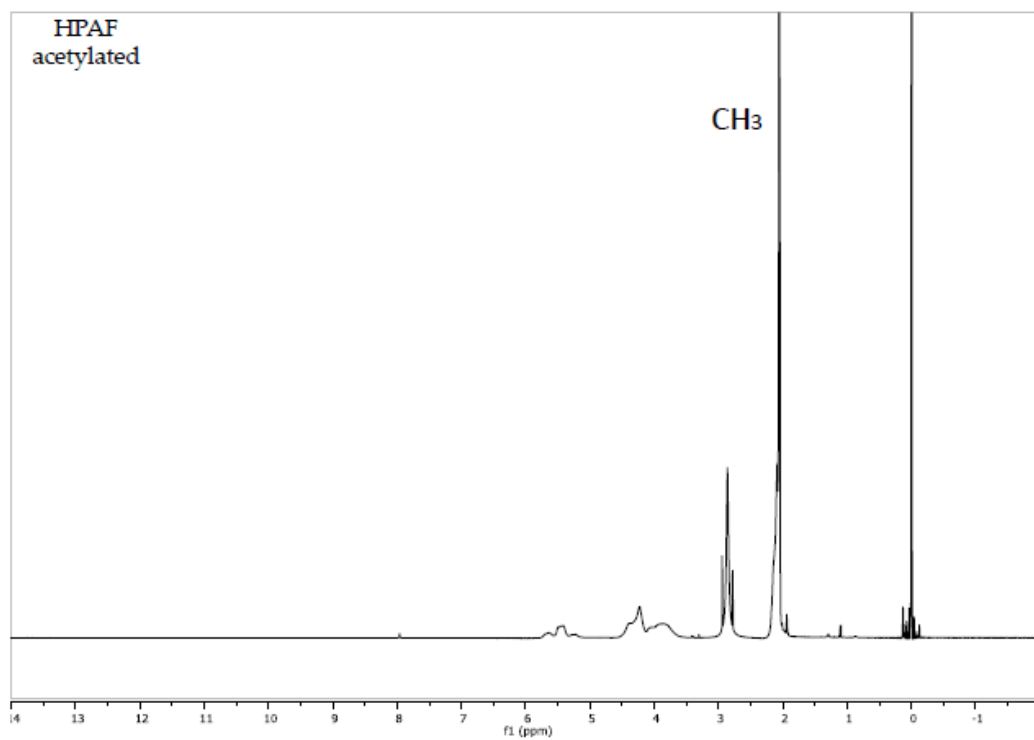

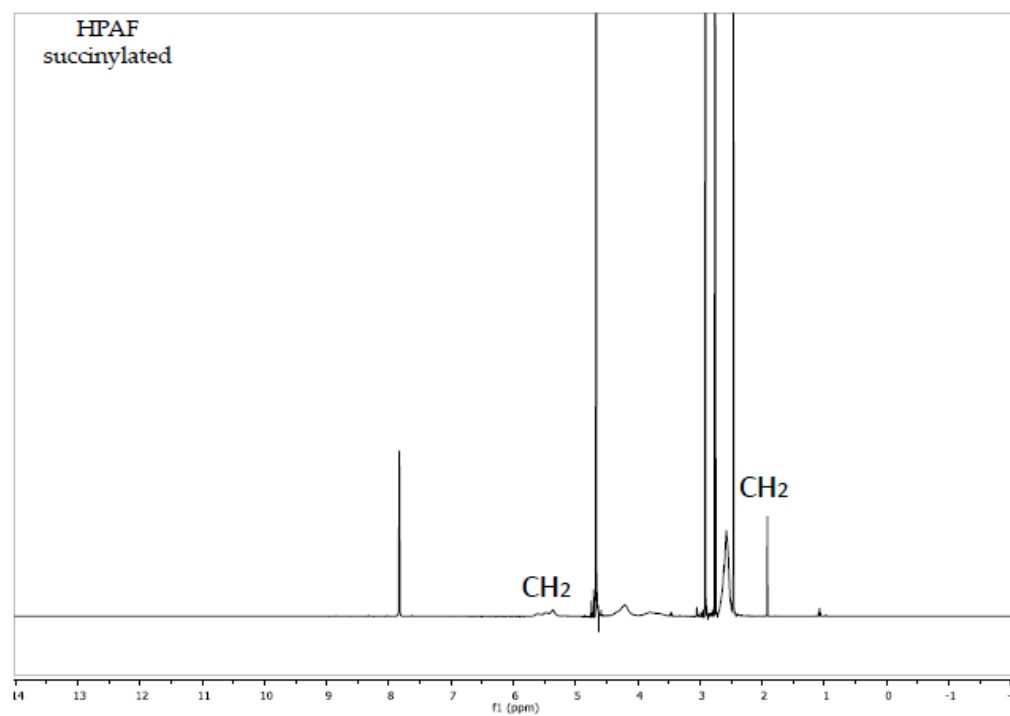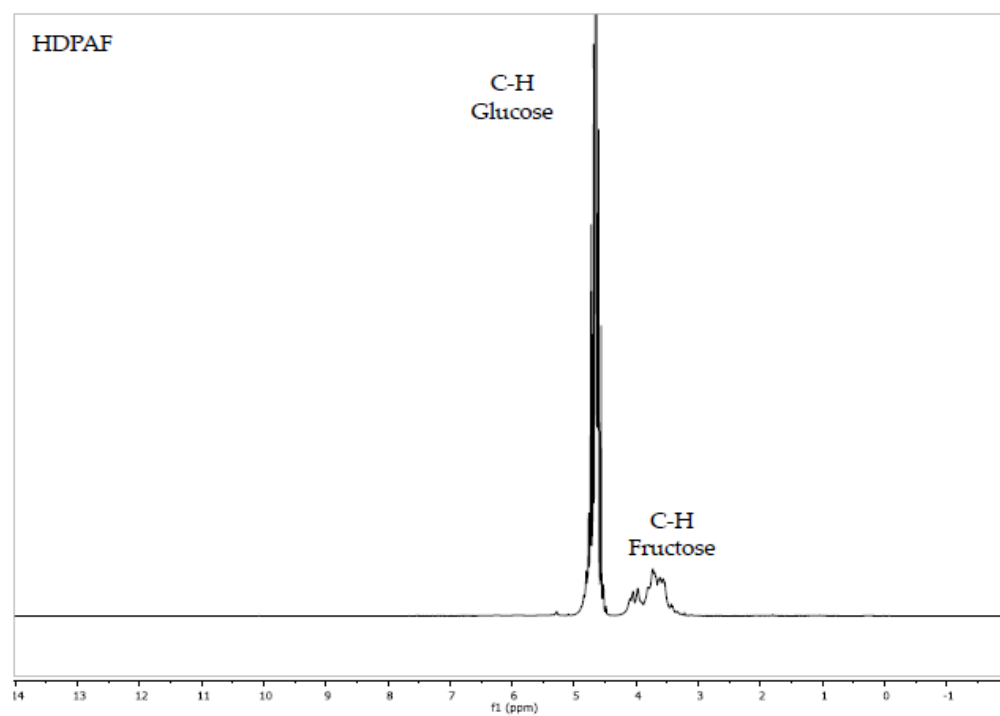

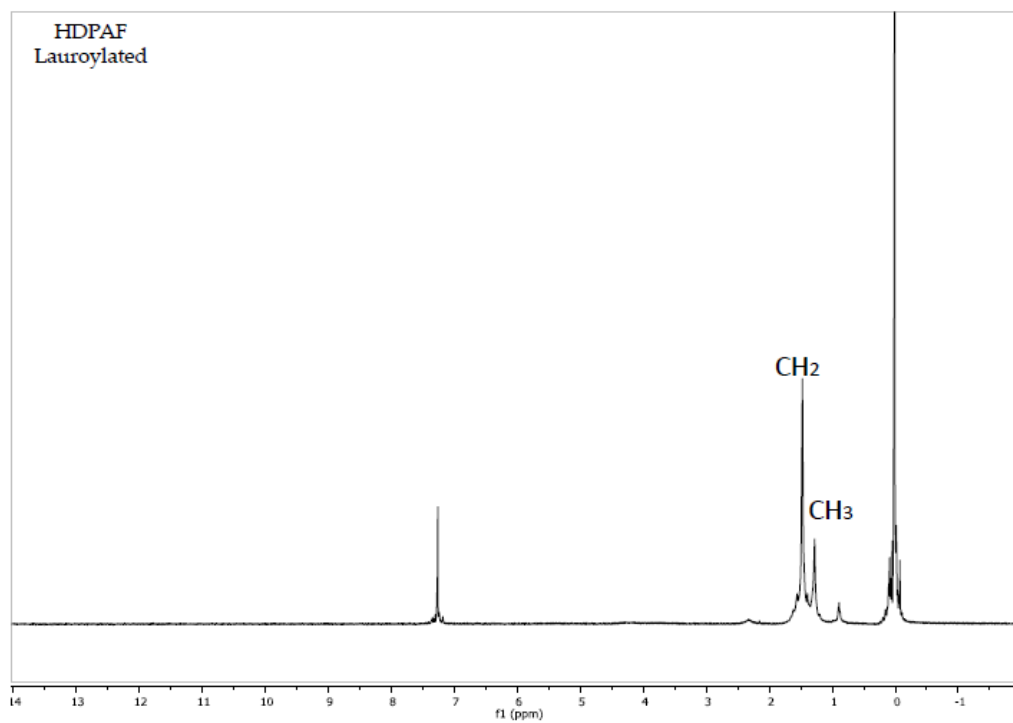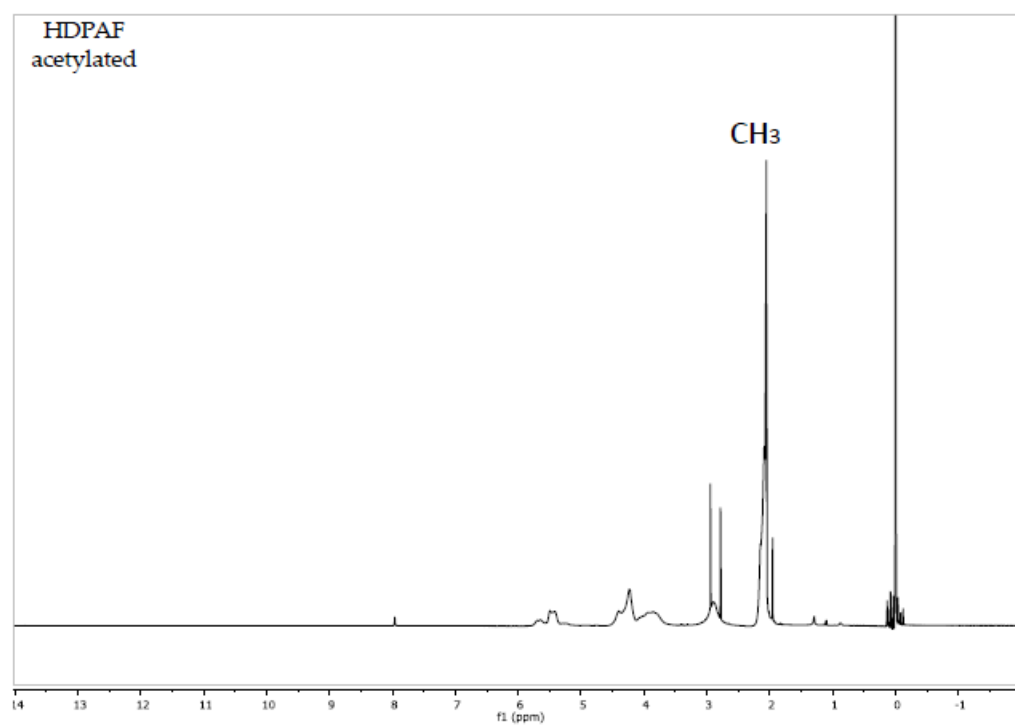

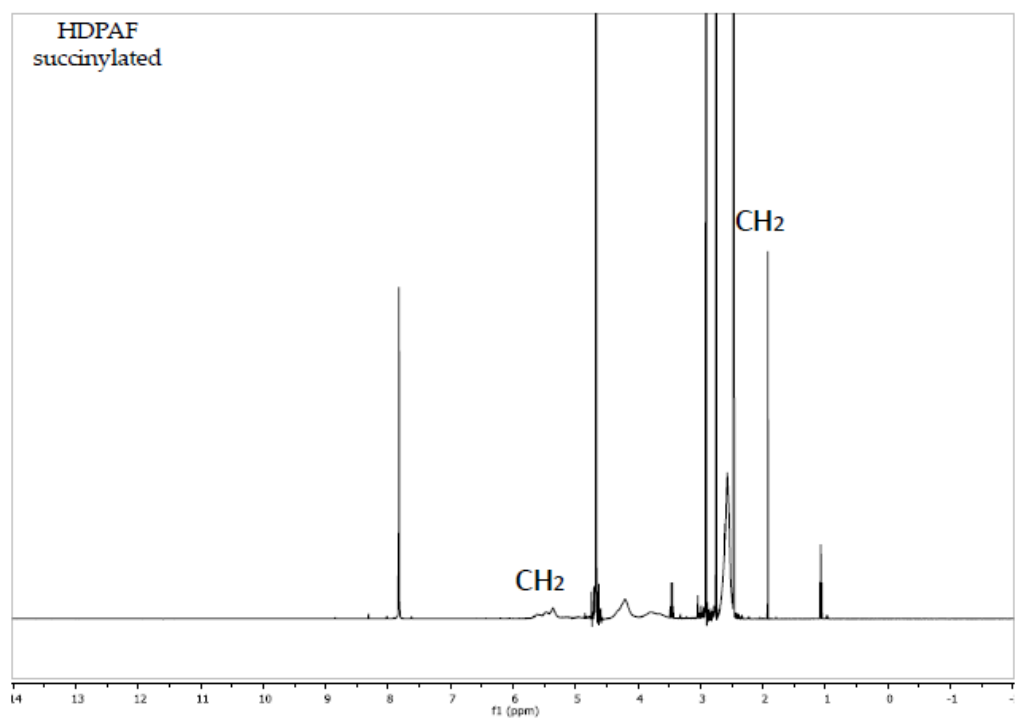

Supplement: s1 [file s1]
